# Supplementary material for: Psychosocial determinants predicting long-term sickness absence: a register-based cohort study
Source: PubMed Central journal article supplement — J Epidemiol Community Health. 2020 Nov 1;74(11):913–8. doi: 10.1136/jech-2020-214181 (PMC7576578; doi:10.1136/jech-2020-214181), 2020-11-01
Supplement: jech-2020-214181s001.pdf [file jech-2020-214181s001.pdf]

**ADDITIONAL FILE 1: NON RESPONSE ANALYSIS**

| Response (n=4972) versus non-response (n=17 564)- Gender |              |                 |        |        |        |                        |
|----------------------------------------------------------|--------------|-----------------|--------|--------|--------|------------------------|
|                                                          |              |                 | Female | Male   |        |                        |
| Group                                                    | Response     | Count           | 2905   | 2067   | 4972   |                        |
|                                                          |              | % within Group  | 58,4%  | 41,6%  | 100.0% |                        |
|                                                          |              | % within Gender | 23,2%  | 20,6%  | 22.1%  |                        |
|                                                          |              | % of Total      | 12,9%  | 9,2%   | 22.1%  |                        |
|                                                          | Non-Response | Count           | 9614   | 7950   | 17564  |                        |
|                                                          |              | % within Group  | 54,7%  | 45,3%  | 100.0% |                        |
|                                                          |              | % within Gender | 76,8%  | 79,4%  | 77.9%  |                        |
|                                                          |              | % of Total      | 42,7%  | 35,3%  | 77.9%  |                        |
| Total                                                    |              | Count           | 12519  | 10017  | 22536  | <b>Chi-square test</b> |
|                                                          |              | % within Group  | 55.6%  | 44,4%  | 100,0% | <b>.000</b>            |
|                                                          |              | % within Gender | 100.0% | 100,0% | 100,0% |                        |
|                                                          |              | % of Total      | 55.6%  | 44,4%  | 100,0% |                        |

| Response (n=4981) versus non-response (n=17581)- Age |                |                |       |       |       |       |       |             |        |
|------------------------------------------------------|----------------|----------------|-------|-------|-------|-------|-------|-------------|--------|
|                                                      |                | Age            |       |       |       |       |       |             | Total  |
|                                                      |                | <25            | 26-35 | 36-45 | 46-55 | 56-65 | 65+   |             |        |
| Response                                             | Count          | 313            | 1075  | 1215  | 1498  | 877   | 3     | 4981        |        |
|                                                      | % within Group | 6,3%           | 21,6% | 24,4% | 30,1% | 17,6% | 0,1%  | 100,0%      |        |
|                                                      | % within Age   | 19,0%          | 19,1% | 20,8% | 23,4% | 28,7% | 42,9% | 22,1%       |        |
|                                                      | % of Total     | 1,4%           | 4,8%  | 5,4%  | 6,6%  | 3,9%  | 0,0%  | 22,1%       |        |
|                                                      | Non-Response   | Count          | 1333  | 4550  | 4617  | 4895  | 2182  | 4           | 17581  |
|                                                      |                | % within Group | 7,6%  | 25,9% | 26,3% | 27,8% | 12,4% | 0,0%        | 100,0% |
|                                                      |                | % within Age   | 81,0% | 80,9% | 79,2% | 76,6% | 71,3% | 57,1%       | 77,9%  |
|                                                      |                | % of Total     | 5,9%  | 20,2% | 20,5% | 21,7% | 9,7%  | 0,0%        | 77,9%  |
| <b>Chi-square test</b>                               |                |                |       |       |       |       |       | <b>.000</b> |        |

**Response (n=2868) versus non-response (n=6626) - Diagnosis**

| Diagnosis                                                           |                    | Group | Total    |              |
|---------------------------------------------------------------------|--------------------|-------|----------|--------------|
|                                                                     |                    |       | Response | Non-response |
| Others                                                              | Count              | 437   | 1038     | 1475         |
|                                                                     | % within Diagnosis | 29,6% | 70,4%    | 100,0%       |
|                                                                     | % within Group     | 15,2% | 15,7%    | 15,5%        |
|                                                                     | % of Total         | 4,6%  | 10,9%    | 15,5%        |
| Neoplasms                                                           | Count              | 147   | 260      | 407          |
|                                                                     | % within Diagnosis | 36,1% | 63,9%    | 100,0%       |
|                                                                     | % within Group     | 5,1%  | 3,9%     | 4,3%         |
|                                                                     | % of Total         | 1,5%  | 2,7%     | 4,3%         |
| mental and behavioral disorders                                     | Count              | 624   | 1741     | 2365         |
|                                                                     | % within Diagnosis | 26,4% | 73,6%    | 100,0%       |
|                                                                     | % within Group     | 21,8% | 26,3%    | 24,9%        |
|                                                                     | % of Total         | 6,6%  | 18,3%    | 24,9%        |
| diseases of bone-muscular system and connective tissue diseases     | Count              | 967   | 2146     | 3113         |
|                                                                     | % within Diagnosis | 31,1% | 68,9%    | 100,0%       |
|                                                                     | % within Group     | 33,7% | 32,4%    | 32,8%        |
|                                                                     | % of Total         | 10,2% | 22,6%    | 32,8%        |
| Injury, poisoning and certain other consequences of external causes | Count              | 301   | 714      | 1015         |
|                                                                     | % within Diagnosis | 29,7% | 70,3%    | 100,0%       |
|                                                                     | % within Group     | 10,5% | 10,8%    | 10,7%        |
|                                                                     | % of Total         | 3,2%  | 7,5%     | 10,7%        |
| factors that influence health status and contact with health care   | Count              | 392   | 727      | 1119         |
|                                                                     | % within Diagnosis | 35,0% | 65,0%    | 100,0%       |
|                                                                     | % within Group     | 13,7% | 11,0%    | 11,8%        |
|                                                                     | % of Total         | 4,1%  | 7,7%     | 11,8%        |
| <b>Chi-Square</b>                                                   | <b>.000</b>        |       |          |              |

| <b>Log rank test for difference in time until end of disability stratified for Gender, diagnosis and Age</b> |            |    |      |
|--------------------------------------------------------------------------------------------------------------|------------|----|------|
| Log rank test                                                                                                | Chi-square | Df | Sig. |
| <b>Gender</b>                                                                                                |            |    |      |
| Female                                                                                                       | 75,157     | 1  | .000 |
| Male                                                                                                         | 69,849     | 1  | .000 |
| <b>Diagnosis</b>                                                                                             |            |    |      |
| Others                                                                                                       | ,009       | 1  | ,925 |
| Neoplasms                                                                                                    | ,562       | 1  | ,454 |
| mental and behavioral disorders                                                                              | ,004       | 1  | ,950 |
| diseases of bone-muscular system and connective tissue diseases                                              | ,130       | 1  | ,717 |
| Injury, poisoning and certain other consequences of external causes                                          | 1,717      | 1  | ,190 |
| factors that influence health status and contact with health care                                            | ,467       | 1  | ,494 |
| <b>Age</b>                                                                                                   |            |    |      |
| < 25                                                                                                         | 15,894     | 1  | .000 |
| 26-35                                                                                                        | 34,588     | 1  | .000 |
| 36-45                                                                                                        | 36,471     | 1  | .000 |
| 46-55                                                                                                        | 29,660     | 1  | .000 |
| 56+                                                                                                          | 14,225     | 1  | .000 |

Unit (subject) **non-response** was related to certain variables (i.e., gender, age, diagnosis). However, the differences are rather small. Weighing techniques were not applied because other, more important factors that we could not measure in the non-response group, might be biased doing so.
