# Supplementary material for: Psychosocial determinants predicting long-term sickness absence: a register-based cohort study
Source: PubMed Central journal article supplement — J Epidemiol Community Health. 2020 Nov 1;74(11):913–8. doi: 10.1136/jech-2020-214181 (PMC7576578; doi:10.1136/jech-2020-214181), 2020-11-01
Supplement: jech-2020-214181s002.pdf [file jech-2020-214181s002.pdf]

**ADDITIONAL FILE 2: DATA CLEANING PROCEDURE**

| <b>DATA CLEANING</b>                           |                         |                     |
|------------------------------------------------|-------------------------|---------------------|
|                                                | <b>Response (22,1%)</b> | <b>Non-Response</b> |
|                                                | 5235                    | 18437               |
| <b>Missings work-resumption</b>                | 37                      | 158                 |
| <b>Negative or 0 time until resumption</b>     | 21                      | 145                 |
| <b>Startdate disability before 01/07/2017*</b> | 193                     | 528                 |
| <b>Part-time &gt; Fulltime</b>                 | 3                       | 25                  |
| <b>Total</b>                                   | <b>4981</b>             | <b>17581</b>        |

\* Data from people who were already unable to work for more than 10 weeks before the August 21 were removed. These individuals may have been initially included for an extension of their disability period although only new disability claims should have been included.
