# Supplementary material for: Psychosocial determinants predicting long-term sickness absence: a register-based cohort study
Source: PubMed Central journal article supplement — J Epidemiol Community Health. 2020 Nov 1;74(11):913–8. doi: 10.1136/jech-2020-214181 (PMC7576578; doi:10.1136/jech-2020-214181), 2020-11-01
Supplement: jech-2020-214181s003.pdf [file jech-2020-214181s003.pdf]

**ADDITIONAL FILE 3: DEMOGRAPHICS FINAL DATASET (N= 4981) AND SUBSET (N= 2868)**

| <b>Main dataset N=4981 /sub dataset N=2868)</b>              |            |           |                                                           |                                                                                          |
|--------------------------------------------------------------|------------|-----------|-----------------------------------------------------------|------------------------------------------------------------------------------------------|
|                                                              | Frequency  | Valid %   | Median time until the end of the disability period (days) | Log Rank or Wilcoxon test* for difference in time until the end of the disability period |
| <b>Gender</b>                                                |            |           |                                                           | 000/,001                                                                                 |
| Male                                                         | 2067/ 1152 | 41,6/40,3 | 128/256                                                   |                                                                                          |
| Female                                                       | 2905/ 1710 | 58,4/59,7 | 154/296                                                   |                                                                                          |
| <b>Age*</b>                                                  |            |           |                                                           | 000/000                                                                                  |
| < 25                                                         | 313/ 147   | 6.3/5,1   | 121/211                                                   |                                                                                          |
| 26-35                                                        | 1075/ 551  | 21.6/19,2 | 133/229                                                   |                                                                                          |
| 36-45                                                        | 1215/ 727  | 24.4/25,3 | 151/285                                                   |                                                                                          |
| 46-55                                                        | 1498/ 904  | 30.1/31,5 | 152/304                                                   |                                                                                          |
| 56-65                                                        | 880/ 539   | 17.7/18,5 | 154/335                                                   |                                                                                          |
| <b>Language</b>                                              |            |           |                                                           | 000/000                                                                                  |
| French                                                       | 1334/ 828  | 26,8/28,9 | 167/360                                                   |                                                                                          |
| Dutch                                                        | 3647/ 2040 | 73,2/71,7 | 137/257                                                   |                                                                                          |
| <b>Diagnosis**</b>                                           |            |           |                                                           | 000                                                                                      |
| Others                                                       | 437        | 15,2      | 273                                                       |                                                                                          |
| Neoplasms***                                                 | 147        | 5,1       | /                                                         |                                                                                          |
| Mental and behavioral disorders                              | 624        | 21,8      | 321                                                       |                                                                                          |
| Factors influencing health contact with health services      | 392        | 13,7      | 275                                                       |                                                                                          |
| Diseases of the musculoskeletal system and connective tissue | 967        | 33,7      | 266                                                       |                                                                                          |
| Injury, poisoning and certain other                          | 301        | 10,5      | 183                                                       |                                                                                          |

|                                 |            |            |         |         |
|---------------------------------|------------|------------|---------|---------|
| consequences of external causes |            |            |         |         |
| <b>Labor status</b>             |            |            |         | 000/000 |
| Employee                        | 4011/ 2258 | 85,7/ 84,1 | 134/253 |         |
| Unemployed                      | 670/ 428   | 14,3/ 15,9 | 196/371 |         |

\* Wilcoxon test for difference in time until the end of disability

\*\*Same for the sub sample

\*\*\*No median time could be calculated because not yet 50% had ended the disability period at the end of the study.
