# Supplementary material for: Psychosocial determinants predicting long-term sickness absence: a register-based cohort study
Source: PubMed Central journal article supplement — J Epidemiol Community Health. 2020 Nov 1;74(11):913–8. doi: 10.1136/jech-2020-214181 (PMC7576578; doi:10.1136/jech-2020-214181), 2020-11-01
Supplement: jech-2020-214181s004.pdf [file jech-2020-214181s004.pdf]

**ADDITIONAL FILE 4 QUICKSCAN QUESTIONNAIRE (61 ITEMS)**

JS= Job Satisfaction, TOE= Terms of employment, EB= Emotional burden, PWL= physical workload, AU= autonomy, SSC= social support by colleagues, LD=learning and development opportunities, SSM= social support by management, TIP= turnover intention profession, WL= Workload, WE= Work Expectations, SLE= Stressful life events, PD= Psychological Distress, HPP= Health perception patient, PP= Pain perception, RTWE= return to work expectations, WHI= work-health interference, RTWN= Return-to-work needs, RE= Recovery expectations, FCE= Fear of colleagues expectations, PF= Perfectionism, WE= work expectations.

| <b>Factor</b> | <b>Question (item)</b>                                                                                                                                                                                                  |
|---------------|-------------------------------------------------------------------------------------------------------------------------------------------------------------------------------------------------------------------------|
| 1             | <b>HPP</b><br>How is your health in general?<br>(Poor) 0 - 1 - 2 - 3 - 4 - 5 (Excellent)                                                                                                                                |
| 2             | <b>HPP</b><br>How do you evaluate your health at the moment compared with two months ago?<br>(A lot worse than two months ago) 0 - 1 - 2 - 3 - 4 - 5 (A lot better than two months ago)                                 |
| 3             | <b>PP</b><br>How much pain did you have in the past week?<br>(No pain) 0 - 1 - 2 - 3 - 4 - 5 (Very serious pain)                                                                                                        |
| 4             | <b>PP</b><br>If you think of everything you do to reduce your pain, to what extent can you reduce the pain on an average day?<br>(I can greatly reduce the pain) 0 - 1 - 2 - 3 - 4 - 5 (I can't reduce the pain at all) |
| 5             | <b>PWL</b><br>Do you have a lot of difficulties lifting or pulling at work?<br>(Never) 0 - 1 - 2 - 3 - 4 - 5 (Always)                                                                                                   |
| 6             | <b>PWL</b><br>Do you have a lot of difficulties at work if you have to bend over regularly?<br>(Never) 0 - 1 - 2 - 3 - 4 - 5 (Always)                                                                                   |
| 7             | <b>PWL</b><br>Do you have a lot of difficulties at work if you regularly have to reach too high ?<br>(Never) 0 - 1 - 2 - 3 - 4 - 5 (Always)                                                                             |
| 8             | <b>PWL</b><br>Do you have a lot of difficulties at work if you have to do the same movement for a long time?<br>(Never) 0 - 1 - 2 - 3 - 4 - 5 (Always)                                                                  |
| 9             | <b>PWL</b><br>Do you find your work very physically demanding?<br>(Never) 0 - 1 - 2 - 3 - 4 - 5 (Always)                                                                                                                |
| 10            | <b>PWL</b><br>Do you need physical strength for your work?<br>(Never) 0 - 1 - 2 - 3 - 4 - 5 (Always)                                                                                                                    |
| 11            | <b>PWL</b><br>Do you work in uncomfortable or strenuous postures?<br>(Never) 0 - 1 - 2 - 3 - 4 - 5 (Always)                                                                                                             |

|    |             |                                                                                                                                                                                                                                                                                                                                                                                                                                                                           |
|----|-------------|---------------------------------------------------------------------------------------------------------------------------------------------------------------------------------------------------------------------------------------------------------------------------------------------------------------------------------------------------------------------------------------------------------------------------------------------------------------------------|
| 12 | <b>JS</b>   | I feel at home at work<br>(Disagree) 0 - 1 - 2 - 3 - 4 - 5 (Strongly agree)                                                                                                                                                                                                                                                                                                                                                                                               |
| 13 | <b>SSM</b>  | My supervisor understands my situation<br>(Disagree) 0 - 1 - 2 - 3 - 4 - 5 (Strongly agree)                                                                                                                                                                                                                                                                                                                                                                               |
| 14 | <b>LD</b>   | My job is very varied and motivating<br>(Disagree) 0 - 1 - 2 - 3 - 4 - 5 (Strongly agree)                                                                                                                                                                                                                                                                                                                                                                                 |
| 15 | <b>SSM</b>  | I feel appreciated by my supervisor<br>(Disagree) 0 - 1 - 2 - 3 - 4 - 5 (Strongly agree)                                                                                                                                                                                                                                                                                                                                                                                  |
| 16 | <b>LD</b>   | My job offers enough challenge<br>(Disagree) 0 - 1 - 2 - 3 - 4 - 5 (Strongly agree)                                                                                                                                                                                                                                                                                                                                                                                       |
| 17 | <b>SSC</b>  | I get a lot of support from my colleagues<br>(Disagree) 0 - 1 - 2 - 3 - 4 - 5 (Strongly agree)                                                                                                                                                                                                                                                                                                                                                                            |
| 18 | <b>TOE</b>  | I'm satisfied with my working conditions (example: salary, working hours, etc.)<br>(Disagree) 0 - 1 - 2 - 3 - 4 - 5 (Strongly agree)                                                                                                                                                                                                                                                                                                                                      |
| 19 | <b>SSC</b>  | I feel appreciated by my colleagues<br>(Disagree) 0 - 1 - 2 - 3 - 4 - 5 (Strongly agree)                                                                                                                                                                                                                                                                                                                                                                                  |
| 20 | <b>TIP</b>  | I haven't yet considered looking for another job<br>(Disagree) 0 - 1 - 2 - 3 - 4 - 5 (Strongly agree)                                                                                                                                                                                                                                                                                                                                                                     |
| 21 | <b>WHI</b>  | If I start working again now, I'm afraid my complaints will get worse<br>(Disagree) 0 - 1 - 2 - 3 - 4 - 5 (Strongly agree)                                                                                                                                                                                                                                                                                                                                                |
| 22 | <b>RTWN</b> | In order to be able to start working again, I think it is necessary to<br>(Please indicate the most appropriate option)<br>0. make no changes to my current workplace<br>1. adapt my workplace and/or working hours temporarily<br>2. be able to take up another function temporarily in my current workplace<br>3. be able to take up another function permanently in my workplace<br>4. take up another job at another workplace<br>5. I can never return to work again |
| 23 | <b>PP</b>   | If the pain gets worse, I have to stop doing what I'm doing until the pain is less bad again<br>(Disagree) 0 - 1 - 2 - 3 - 4 - 5 (Strongly agree)                                                                                                                                                                                                                                                                                                                         |
| 24 | <b>PD</b>   | How worried are you about your illness?<br>(Not at all worried) 0 - 1 - 2 - 3 - 4 - 5 (Very worried)                                                                                                                                                                                                                                                                                                                                                                      |

|    |           |                                                                                                                                                                                              |
|----|-----------|----------------------------------------------------------------------------------------------------------------------------------------------------------------------------------------------|
| 25 | <b>PD</b> | Does your illness have an influence on your emotions (does your illness make you scared, angry, panicky, depressed?)<br><br>(No influence at all) 0 - 1 - 2 - 3 - 4 - 5 (A lot of influence) |
| 26 | <b>PD</b> | In the last week, have you slept less due to worries?<br><br>(Never) 0 - 1 - 2 - 3 - 4 - 5 (Always)                                                                                          |
| 27 | <b>PD</b> | In the last week, have you had the feeling of being under pressure?<br><br>(Never) 0 - 1 - 2 - 3 - 4 - 5 (Always)                                                                            |
| 28 | <b>PD</b> | In the last week, have you had the feeling that you will not be able to solve your difficulties?<br><br>(Never) 0 - 1 - 2 - 3 - 4 - 5 (Always)                                               |
| 29 | <b>PD</b> | In the last week, have you felt like you're a worthless person?<br><br>(Never) 0 - 1 - 2 - 3 - 4 - 5 (Always)                                                                                |
| 30 | <b>PD</b> | In the last week, have you felt rather unhappy?<br><br>(Never) 0 - 1 - 2 - 3 - 4 - 5 (Always)                                                                                                |
| 31 | <b>WL</b> | Do you work under time pressure?<br><br>(Never) 0 - 1 - 2 - 3 - 4 - 5 (Always)                                                                                                               |
| 32 | <b>WL</b> | Do you have a backlog in your tasks at work?<br><br>(Never) 0 - 1 - 2 - 3 - 4 - 5 (Always)                                                                                                   |
| 33 | <b>WL</b> | Would you rather work a bit more quietly?<br><br>(Never) 0 - 1 - 2 - 3 - 4 - 5 (Always)                                                                                                      |
| 34 | <b>WL</b> | I have to do too much at work<br><br>(Disagree) 0 - 1 - 2 - 3 - 4 - 5 (Strongly agree)                                                                                                       |
| 35 | <b>WL</b> | Because of my work I don't have a lot of time for family or friends<br><br>(Disagree) 0 - 1 - 2 - 3 - 4 - 5 (Strongly agree)                                                                 |
| 36 | <b>WL</b> | To get my work done every day, I have to work very hard<br><br>(Disagree) 0 - 1 - 2 - 3 - 4 - 5 (Strongly agree)                                                                             |
| 37 | <b>WL</b> | My work takes up a lot of my energy<br><br>(Disagree) 0 - 1 - 2 - 3 - 4 - 5 (Strongly agree)                                                                                                 |
| 38 | <b>AU</b> | Before my period of illness I could ask and get adaptations to increase my comfort at work<br><br>(Disagree) 0 - 1 - 2 - 3 - 4 - 5 (Strongly agree)                                          |
| 29 | <b>AU</b> | Before my period of illness I could organize my work myself (number and burden of tasks)<br><br>(Disagree) 0 - 1 - 2 - 3 - 4 - 5 (Strongly agree)                                            |
| 40 | <b>AU</b> | Before my period of illness I could work at my own tempo                                                                                                                                     |

|    |            |                                                                                                                                     |
|----|------------|-------------------------------------------------------------------------------------------------------------------------------------|
|    |            | (Disagree) 0 - 1 - 2 - 3 - 4 - 5 (Strongly agree)                                                                                   |
| 41 | <b>AU</b>  | Before my period of illness I could choose how I did my work<br>(Disagree) 0 - 1 - 2 - 3 - 4 - 5 (Strongly agree)                   |
| 42 | <b>AU</b>  | Before my period of illness my work allowed me to make decisions independently<br>(Disagree) 0 - 1 - 2 - 3 - 4 - 5 (Strongly agree) |
| 43 | <b>EB</b>  | I never have to do emotionally demanding work<br>(Disagree) 0 - 1 - 2 - 3 - 4 - 5 (Strongly agree)                                  |
| 44 | <b>LD</b>  | Do you have possibilities for personal growth and development at work?<br>(Not at all) 0 - 1 - 2 - 3 - 4 - 5 (Completely)           |
| 45 | <b>LD</b>  | Does your work give you the feeling that you can achieve something?<br>(Not at all) 0 - 1 - 2 - 3 - 4 - 5 (Completely)              |
| 46 | <b>FCE</b> | I'm worried about what my colleagues think of my absence<br>(Disagree) 0 - 1 - 2 - 3 - 4 - 5 (Strongly agree)                       |
| 47 | <b>WE</b>  | When I'm back I'll have to work hard or more hours to catch up with my backlog<br>(Disagree) 0 - 1 - 2 - 3 - 4 - 5 (Strongly agree) |
| 48 | <b>PF</b>  | I'm two hundred percent committed to my work<br>(Disagree) 0 - 1 - 2 - 3 - 4 - 5 (Strongly agree)                                   |
| 49 | <b>PF</b>  | I think it's very bad when I make a mistake<br>(Disagree) 0 - 1 - 2 - 3 - 4 - 5 (Strongly agree)                                    |
| 50 | <b>PF</b>  | I find it difficult to work less hard<br>(Disagree) 0 - 1 - 2 - 3 - 4 - 5 (Strongly agree)                                          |
| 51 | <b>PF</b>  | It's difficult for me to say no to colleagues if I want to<br>(Disagree) 0 - 1 - 2 - 3 - 4 - 5 (Strongly agree)                     |
| 52 | <b>SLE</b> | In the past year, my private life has changed a lot<br>(Disagree) 0 - 1 - 2 - 3 - 4 - 5 (Strongly agree)                            |
| 53 | <b>SLE</b> | I've had a lot of bad luck in the past year<br>(Disagree) 0 - 1 - 2 - 3 - 4 - 5 (Strongly agree)                                    |
| 54 | <b>SLE</b> | A lot of annoying things have happened in my life, which I often think about<br>(Disagree) 0 - 1 - 2 - 3 - 4 - 5 (Strongly agree)   |
| 55 | <b>SLE</b> | I often think about the situation at home<br>(Disagree) 0 - 1 - 2 - 3 - 4 - 5 (Strongly agree)                                      |
| 56 | <b>SLE</b> | The problems at home take up a lot of my energy                                                                                     |

|    |             |                                                                                                                                                                                 |
|----|-------------|---------------------------------------------------------------------------------------------------------------------------------------------------------------------------------|
|    |             | (Disagree) 0 - 1 - 2 - 3 - 4 - 5 (Strongly agree)                                                                                                                               |
| 57 | <b>SLE</b>  | I have the feeling that I participate in the routine at home but that I can't do what I would like to do myself<br>(Disagree) 0 - 1 - 2 - 3 - 4 - 5 (Strongly agree)            |
| 58 | <b>SLE</b>  | I'm disappointed by people in my environment<br>(Disagree) 0 - 1 - 2 - 3 - 4 - 5 (Strongly agree)                                                                               |
| 59 | <b>SLE</b>  | It's difficult to find energy for my work, because my social situation is not good<br>(Disagree) 0 - 1 - 2 - 3 - 4 - 5 (Strongly agree)                                         |
| 60 | <b>RTWE</b> | Do you think you can restart your normal work within a period of four weeks, without limitations due to your illness?<br>(Certainly not) 0 - 1 - 2 - 3 - 4 - 5 (Most certainly) |
| 61 | <b>RE</b>   | My treatment will cure my injury/injuries and symptoms<br>(Disagree) 0 - 1 - 2 - 3 - 4 - 5 (Strongly agree)                                                                     |
