# Supplementary material for: Psychosocial determinants predicting long-term sickness absence: a register-based cohort study
Source: PubMed Central journal article supplement — J Epidemiol Community Health. 2020 Nov 1;74(11):913–8. doi: 10.1136/jech-2020-214181 (PMC7576578; doi:10.1136/jech-2020-214181), 2020-11-01
Supplement: jech-2020-214181s005.pdf [file jech-2020-214181s005.pdf]

**ADDITIONAL FILE 5: COX REGRESSION SELECTION MODEL**

| <b>Selection model backward conditional selection</b>                   |                                        |             |           |             |
|-------------------------------------------------------------------------|----------------------------------------|-------------|-----------|-------------|
| <b>p &lt; .10(*). p &lt; .05(**).p &lt; .01(***). p &lt; .001(****)</b> |                                        |             |           |             |
| <b>Item</b>                                                             | <b>Factor</b>                          | <b>Wald</b> | <b>df</b> | <b>Sig.</b> |
| Labor status                                                            |                                        | 1.168       | 1         | .280        |
| Gender                                                                  |                                        | 47.653      | 1         | .000****    |
| Age                                                                     |                                        | 14.184      | 1         | .000****    |
| Q1                                                                      | Health perception patient              | 42.146      | 5         | .000****    |
| Q6                                                                      | Physical workload                      | 13.226      | 5         | .022**      |
| Q8                                                                      | Physical workload                      | 10.315      | 5         | .075*       |
| Q12                                                                     | Job satisfaction                       | 9.567       | 5         | .086*       |
| Q13                                                                     | Social support management              | 21.546      | 5         | .001****    |
| Q15                                                                     | Social support management              | 11.838      | 5         | .035**      |
| Q19                                                                     | Social support colleagues              | 10.019      | 5         | .070*       |
| Q21                                                                     | Work-health interference               | 62.630      | 5         | .000****    |
| Q24                                                                     | Psychological distress                 | 65.959      | 5         | .000****    |
| Q30                                                                     | Psychological distress                 | 11.427      | 5         | .044**      |
| Q33                                                                     | Workload                               | 10.947      | 5         | .056*       |
| Q42                                                                     | Autonomy                               | 12.364      | 5         | .028**      |
| Q44                                                                     | Learning and development opportunities | 11.094      | 5         | .051*       |
| Q46                                                                     | Fear of colleagues expectations        | 15.027      | 5         | .009*       |
| Q47                                                                     | Work expectations                      | 15.291      | 5         | .011**      |
| Q53                                                                     | Stressful life events                  | 17.459      | 5         | .004**      |
| Q58                                                                     | Stressful life events                  | 12.418      | 5         | .030**      |
| Q60                                                                     | Return to work expectations            | 214.076     | 5         | .000****    |
